## ERRATA

Errata on “Transient Thermal Stresses in Cylindrically Orthotropic Composite Tubes,” ASME JOURNAL OF APPLIED MECHANICS, Vol. 56, June 1989, pp. 411–417, and on the follow-up paper, “The Initial Phase of Transient Thermal Stresses due to General Boundary Thermal Loads in Orthotropic Hollow Cylinders,” ASME JOURNAL OF APPLIED MECHANICS, Vol. 57, Sept. 1990, pp. 719–724, both by G. A. Kardomateas.

The term  $q_2$  was omitted in Eq. (14) of the 1989 paper and Eq. (11) of the 1990 paper, and this error carried through in the remaining of the equations, which otherwise are correct.

To account for this error, replace  $d_{4n}$  and  $d_{5n}$  in these equations (e.g., Eq. (14) of the 1989 paper and all equations thereafter that involve  $d_{4n}$  or  $d_{5n}$ ) by  $d_{4n}q_2$  and  $d_{5n}q_2$ , respectively, as well as replace  $q_1$  by  $q_1/q_2$  and  $q_3$  by  $q_3/q_2$ .
